# Supplementary material for: Fecal Calprotectin and Phenotype Severity in Patients with Cystic Fibrosis: A Systematic Review and Meta-Analysis
Source: PubMed Central journal article supplement — Pediatr Gastroenterol Hepatol Nutr. 2022 Jan 7;25(1):1–12. doi: 10.5223/pghn.2022.25.1.1 (PMC8762598; doi:10.5223/pghn.2022.25.1.1), 2022-01-07
Supplement: pghn-25-1-s003.pdf [file pghn-25-1-s003.pdf]

**Supplementary Table 3.** Risk of bias based on ROBINS-I assessment tool

| The Risk of Bias in Non-Randomized Studies-of-Interventions (ROBINS-I) Assessment Tool |                                                      |                      |
|----------------------------------------------------------------------------------------|------------------------------------------------------|----------------------|
| Adriaanse et al. [18]                                                                  |                                                      |                      |
| Pre-intervention and at-intervention domains                                           | Bias due to confounding                              | Moderate risk        |
|                                                                                        | Bias in the selection of participants into the study | Moderate risk        |
|                                                                                        | Bias in the classification of interventions          | Low risk             |
| Post-intervention domains                                                              | Bias due to deviations from intended intervention    | Low risk             |
|                                                                                        | Bias due to missing data                             | Low risk             |
|                                                                                        | Bias in the measurement of outcomes                  | Low risk             |
|                                                                                        | Bias in the selection of the reported result         | Low risk             |
| Interpretation of domain-level and overall risk of bias judgments                      | Within each domain                                   | Low risk             |
|                                                                                        | Across domains                                       | Low risk             |
|                                                                                        | Criterion                                            | Low to moderate risk |
| Werlin et al. [20]                                                                     |                                                      |                      |
| Pre-intervention and at-intervention domains                                           | Bias due to confounding                              | Low risk             |
|                                                                                        | Bias in the selection of participants into the study | Low risk             |
|                                                                                        | Bias in the classification of interventions          | Moderate risk        |
| Post-intervention domains                                                              | Bias due to deviations from intended intervention    | Low risk             |
|                                                                                        | Bias due to missing data                             | Low risk             |
|                                                                                        | Bias in the measurement of outcomes                  | Low risk             |
|                                                                                        | Bias in the selection of the reported result         | Low risk             |
| Interpretation of domain-level and overall risk of bias judgments                      | Low risk                                             | Within each domain   |
|                                                                                        | Low risk                                             | Across domains       |
|                                                                                        | Low to moderate risk                                 | Criterion            |
| Parisi et al. [10]                                                                     |                                                      |                      |
| Pre-intervention and at-intervention domains                                           | Bias due to confounding                              | Low risk             |
|                                                                                        | Bias in the selection of participants into the study | Low risk             |
|                                                                                        | Bias in the classification of interventions          | Low risk             |
| Post-intervention domains                                                              | Bias due to deviations from intended intervention    | Low risk             |
|                                                                                        | Bias due to missing data                             | Low risk             |
|                                                                                        | Bias in the measurement of outcomes                  | Low risk             |
|                                                                                        | Bias in the selection of the reported result         | Low risk             |
| Interpretation of domain-level and overall risk of bias judgments                      | Within each domain                                   | Low risk             |
|                                                                                        | Across domains                                       | Low risk             |
|                                                                                        | Criterion                                            | Low risk             |
| Dhaliwal et al. [19]                                                                   |                                                      |                      |
| Pre-intervention and at-intervention domains                                           | Bias due to confounding                              | Moderate risk        |
|                                                                                        | Bias in the selection of participants into the study | Low risk             |
|                                                                                        | Bias in the classification of interventions          | Low risk             |
| Post-intervention domains                                                              | Bias due to deviations from intended intervention    | Low risk             |
|                                                                                        | Bias due to missing data                             | Low risk             |
|                                                                                        | Bias in the measurement of outcomes                  | Low risk             |
|                                                                                        | Bias in the selection of the reported result         | Low risk             |
| Interpretation of domain-level and overall risk of bias judgments                      | Within each domain                                   | Low risk             |
|                                                                                        | Across domains                                       | Low risk             |
|                                                                                        | Criterion                                            | Low to moderate risk |
| de Freitas et al. [22]                                                                 |                                                      |                      |
| Pre-intervention and at-intervention domains                                           | Bias due to confounding                              | Low risk             |
|                                                                                        | Bias in the selection of participants into the study | Low risk             |
|                                                                                        | Bias in the classification of interventions          | Low risk             |
| Post-intervention domains                                                              | Bias due to deviations from intended intervention    | Low risk             |
|                                                                                        | Bias due to missing data                             | Low risk             |
|                                                                                        | Bias in the measurement of outcomes                  | Low risk             |
|                                                                                        | Bias in the selection of the reported result         | Low risk             |
| Interpretation of domain-level and overall risk of bias judgments                      | Within each domain                                   | Low risk             |
|                                                                                        | Across domains                                       | Low risk             |
|                                                                                        | Criterion                                            | Low risk             |

**Supplementary Table 3.** Continued

| The Risk of Bias in Non-Randomized Studies-of-Interventions (ROBINS-I) Assessment Tool |                                                       |          |
|----------------------------------------------------------------------------------------|-------------------------------------------------------|----------|
| Stallings et al. [21]                                                                  |                                                       |          |
| Pre-intervention and at-intervention domains                                           | Bias due to confounding                               | Low risk |
|                                                                                        | Bias in the selection of participants into the study  | Low risk |
|                                                                                        | Bias in the classification of interventions           | Low risk |
| Post-intervention domains                                                              | Bias due to deviations from the intended intervention | Low risk |
|                                                                                        | Bias due to missing data                              | Low risk |
|                                                                                        | Bias in the measurement of outcomes                   | Low risk |
|                                                                                        | Bias in the selection of the reported result          | Low risk |
| Interpretation of domain-level and overall risk of bias judgments                      | Within each domain                                    | Low risk |
|                                                                                        | Across domains                                        | Low risk |
|                                                                                        | Criterion                                             | Low risk |
