# Supplementary material for: Fecal Calprotectin and Phenotype Severity in Patients with Cystic Fibrosis: A Systematic Review and Meta-Analysis
Source: PubMed Central journal article supplement — Pediatr Gastroenterol Hepatol Nutr. 2022 Jan 7;25(1):1–12. doi: 10.5223/pghn.2022.25.1.1 (PMC8762598; doi:10.5223/pghn.2022.25.1.1), 2022-01-07
Supplement: pghn-25-1-s004.pdf [file pghn-25-1-s004.pdf]

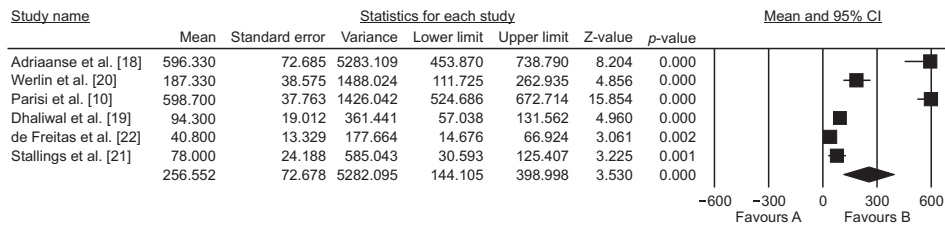

**Supplementary Fig. 1.** Mean, upper, and lower limit range of fecal calprotectin levels in cystic fibrosis patients. CI: confidence interval.
