# Supplementary material for: Fecal Calprotectin and Phenotype Severity in Patients with Cystic Fibrosis: A Systematic Review and Meta-Analysis
Source: PubMed Central journal article supplement — Pediatr Gastroenterol Hepatol Nutr. 2022 Jan 7;25(1):1–12. doi: 10.5223/pghn.2022.25.1.1 (PMC8762598; doi:10.5223/pghn.2022.25.1.1), 2022-01-07
Supplement: pghn-25-1-s005.pdf [file pghn-25-1-s005.pdf]

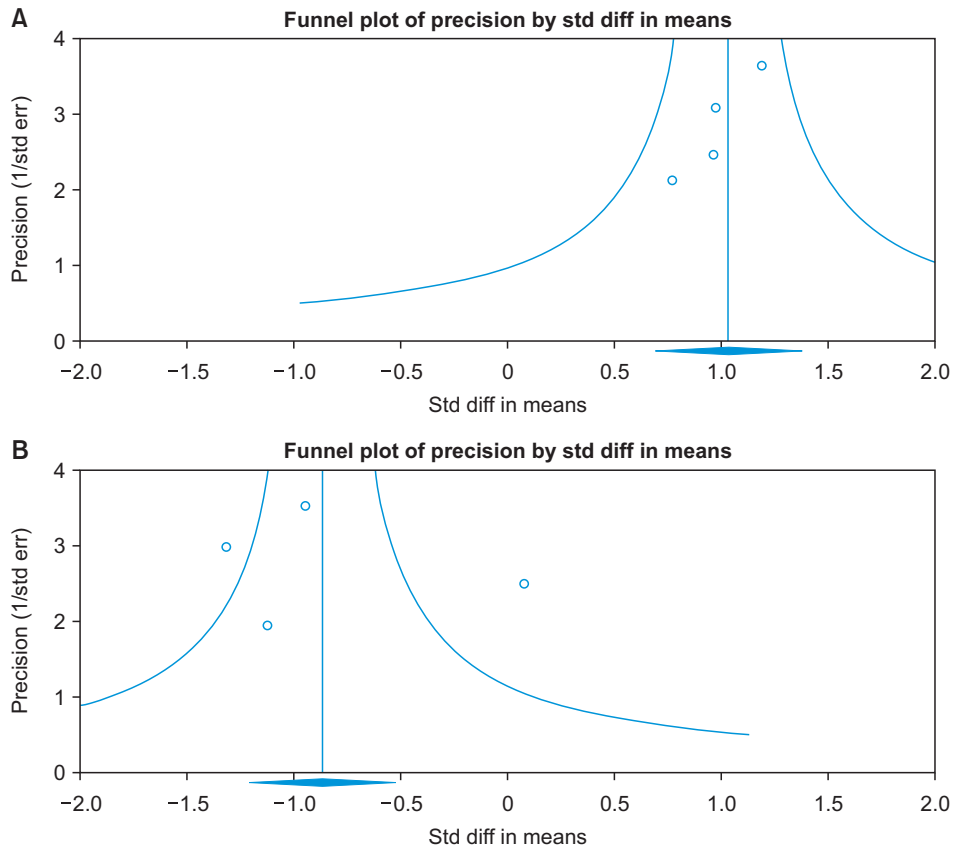

**Supplementary Fig. 2.** (A) Funnel plot of including studies for evaluating the relationship between fecal calprotectin level in pancreatic insufficient and pancreatic sufficient cystic fibrosis (CF) patients. (B) Funnel plot of included studies for evaluating the relationship between pulmonary function test and fecal calprotectin in CF patients.
